# Supplementary material
Source: HighWire-hosted journal article supplement (https://bmjopen.bmj.com/content/7/3/e012187)

**Supplementary Figure 1** Flow chart of the PACT randomized clinical trial, for costeffectiveness analyses

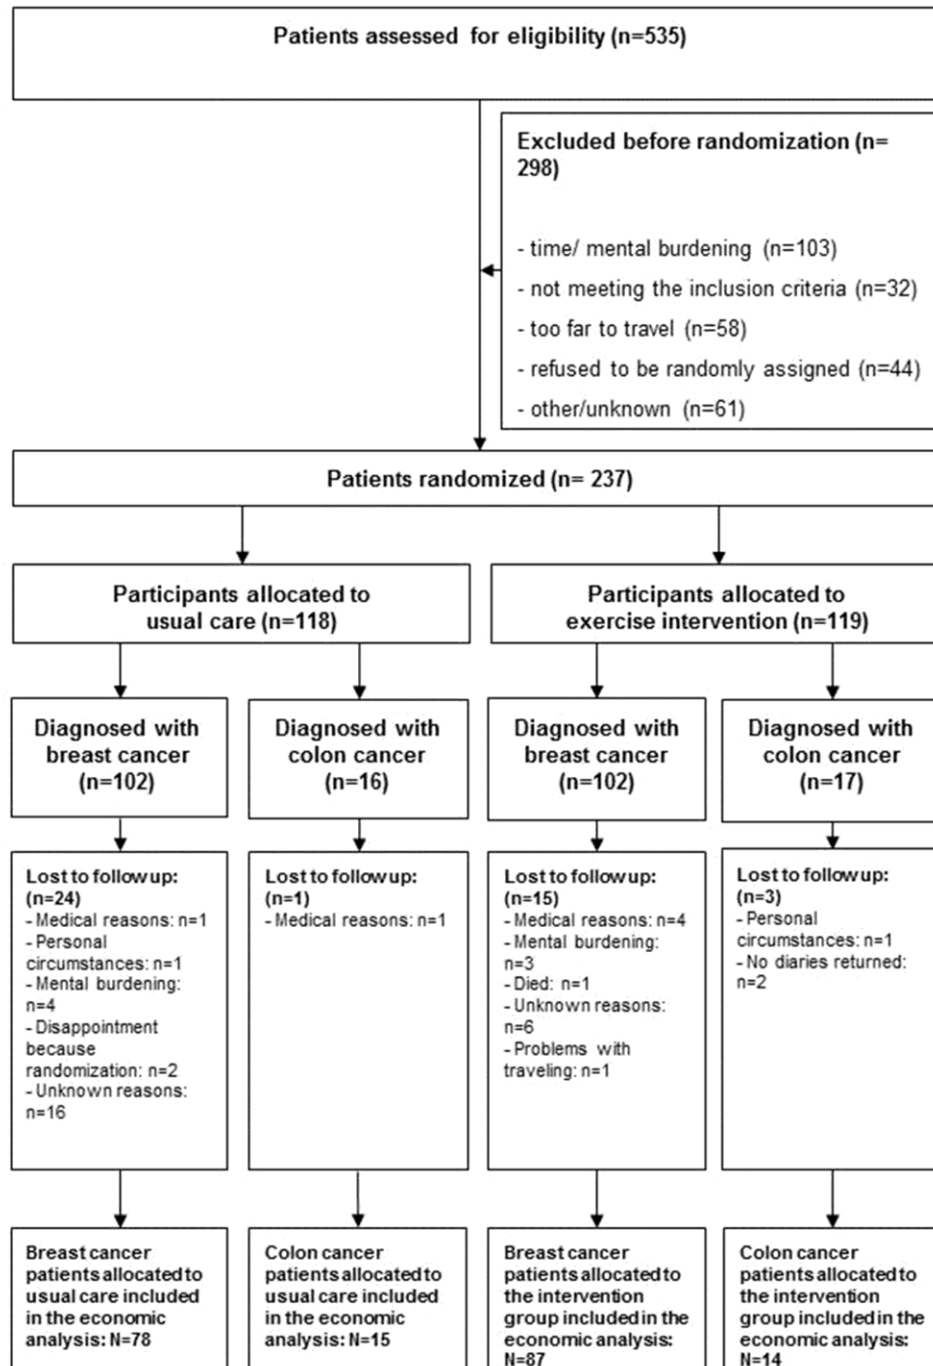

Supplement: inline-supplementary-material-2 [file inline-supplementary-material-2.pdf]
